# Supplementary material for: Secreted aspartyl protease 3 regulated by the Ras/cAMP/PKA pathway promotes the virulence of Candida auris
Source: PubMed Central journal article supplement (PMC10540861; doi:10.3389/fcimb.2023.1257897), 2023-09-15

Figure S1 (Kim et al.)

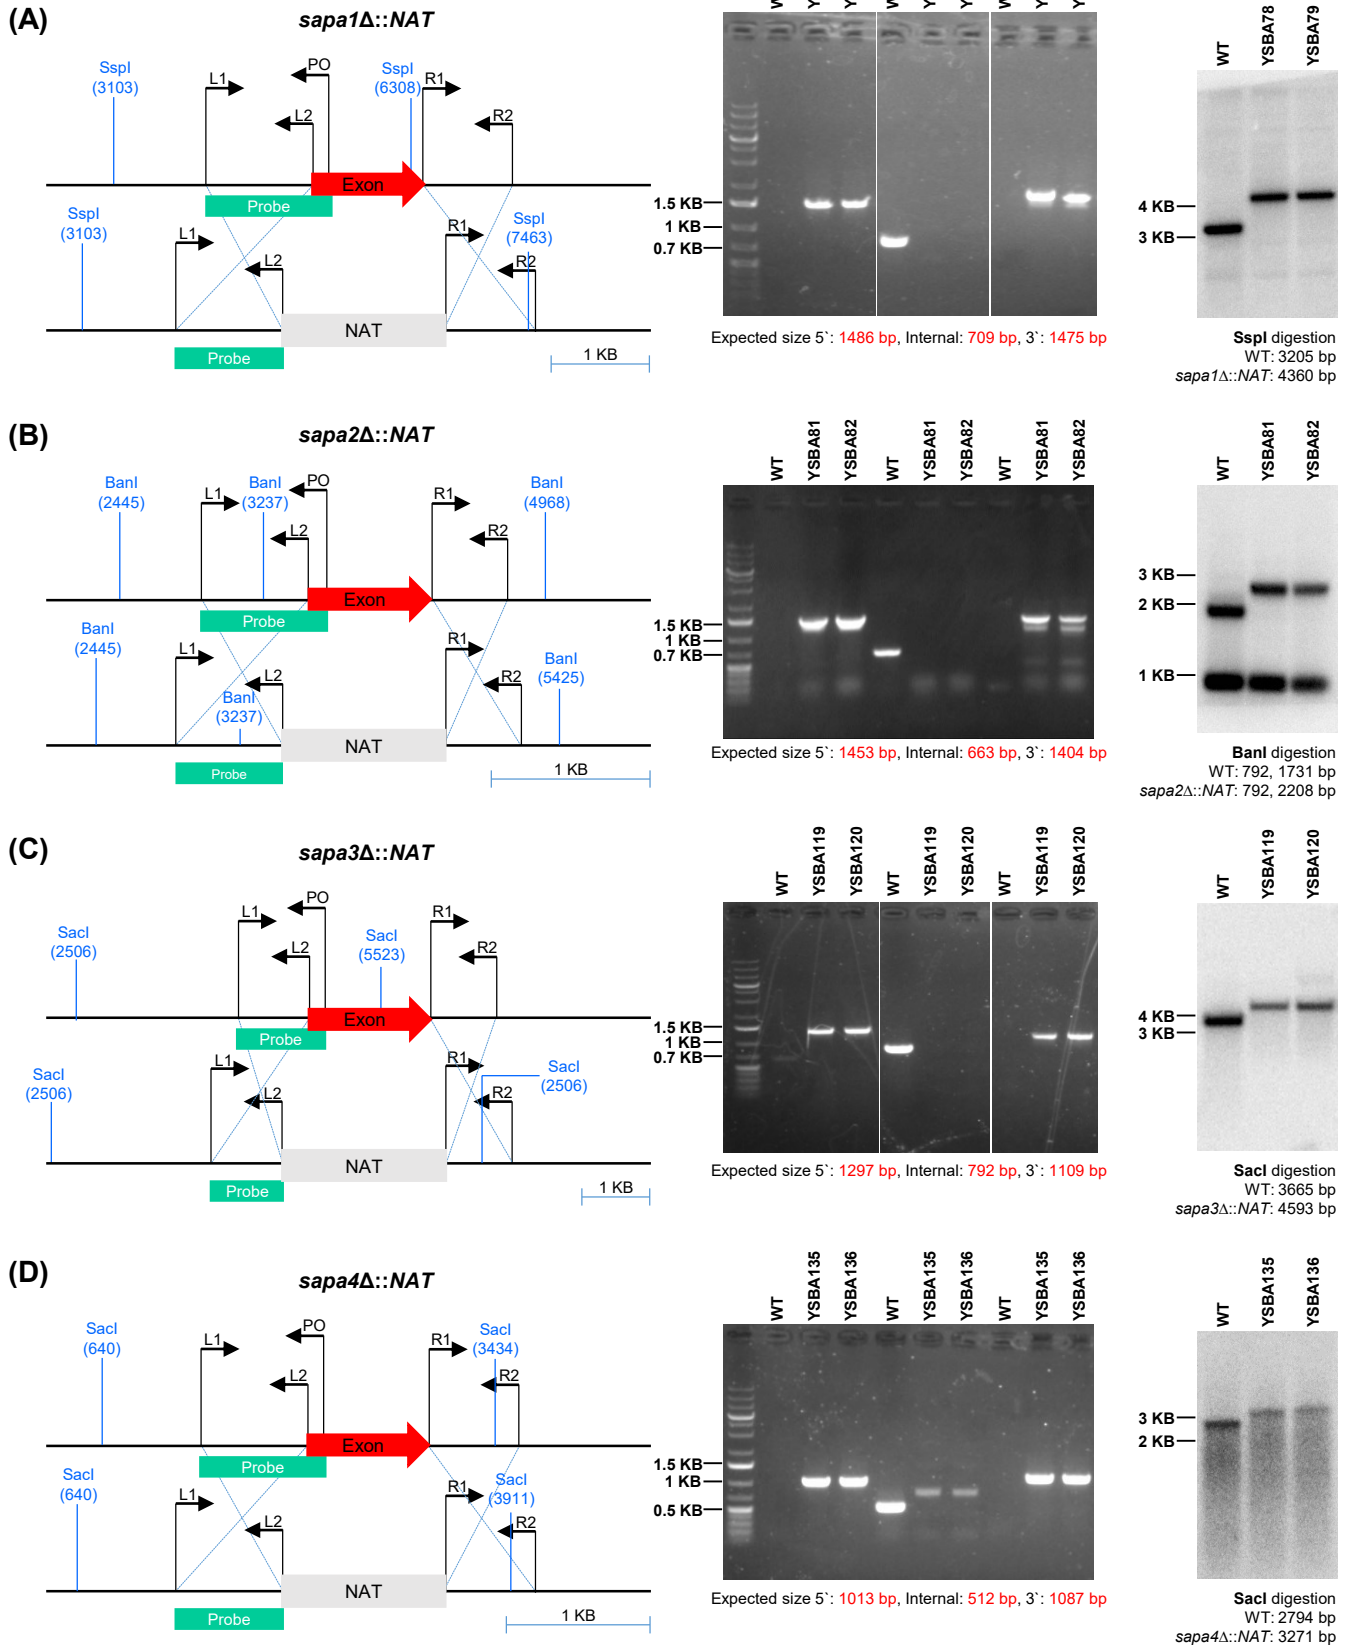

Figure S1 (Kim et al.)

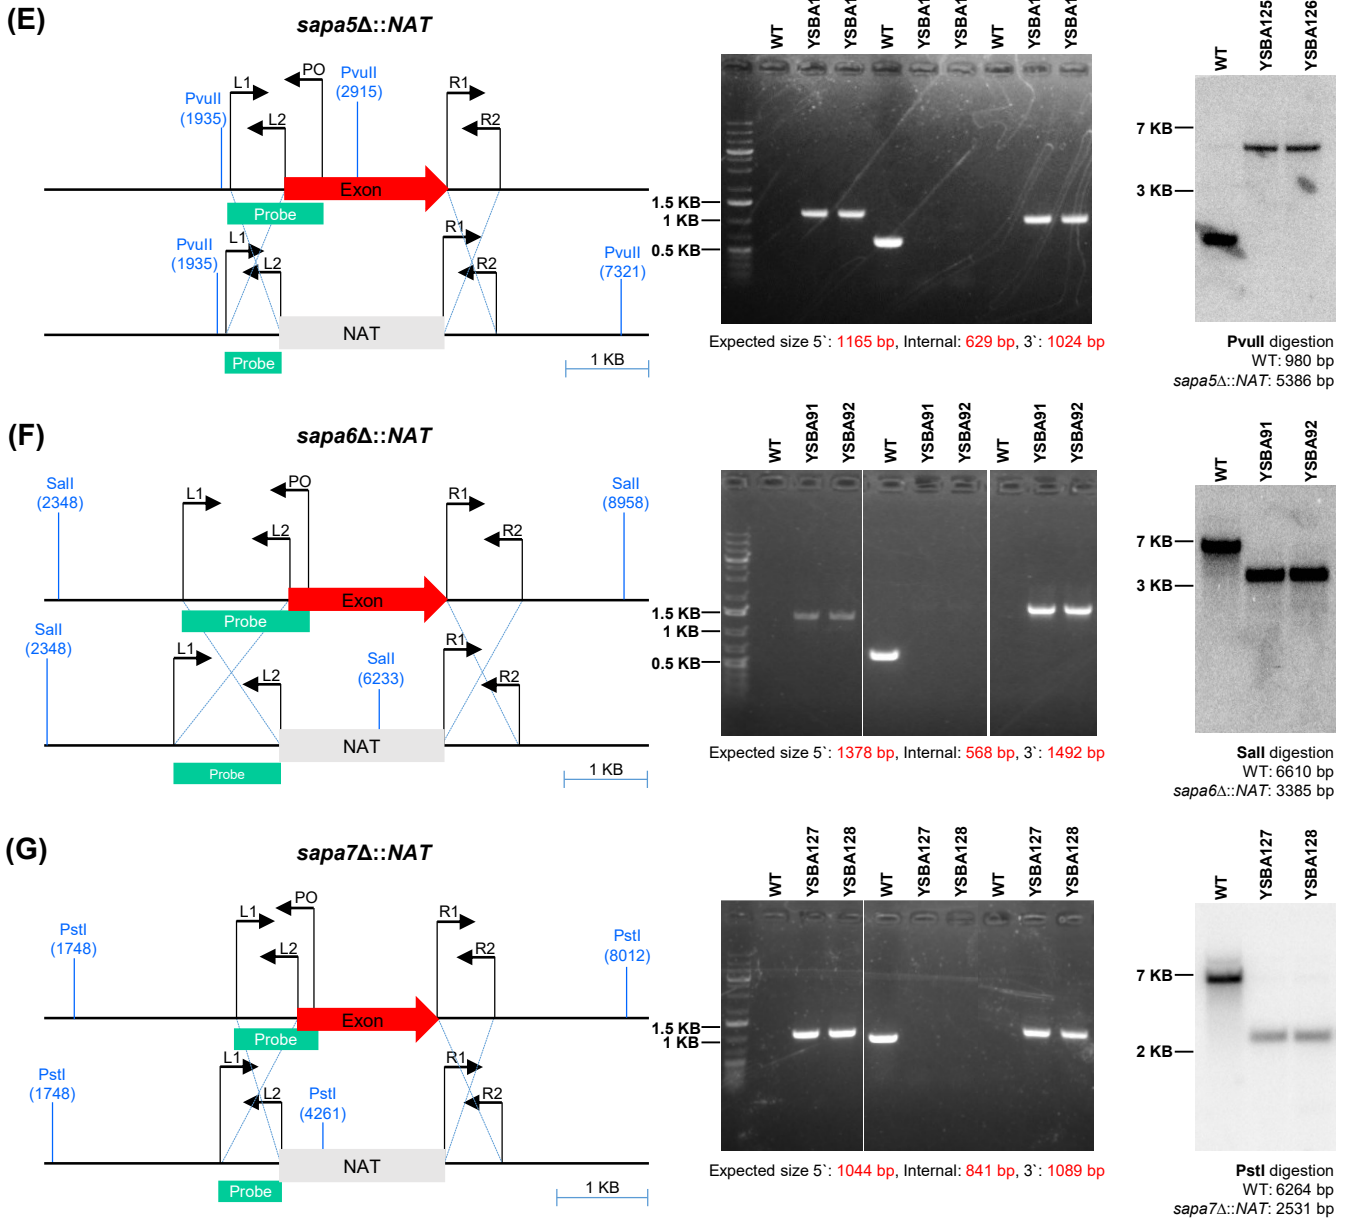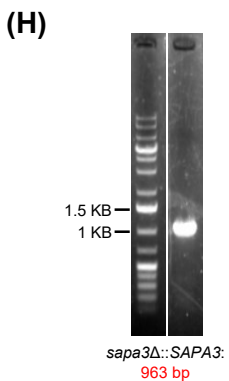

Figure S2 (Kim et al.)

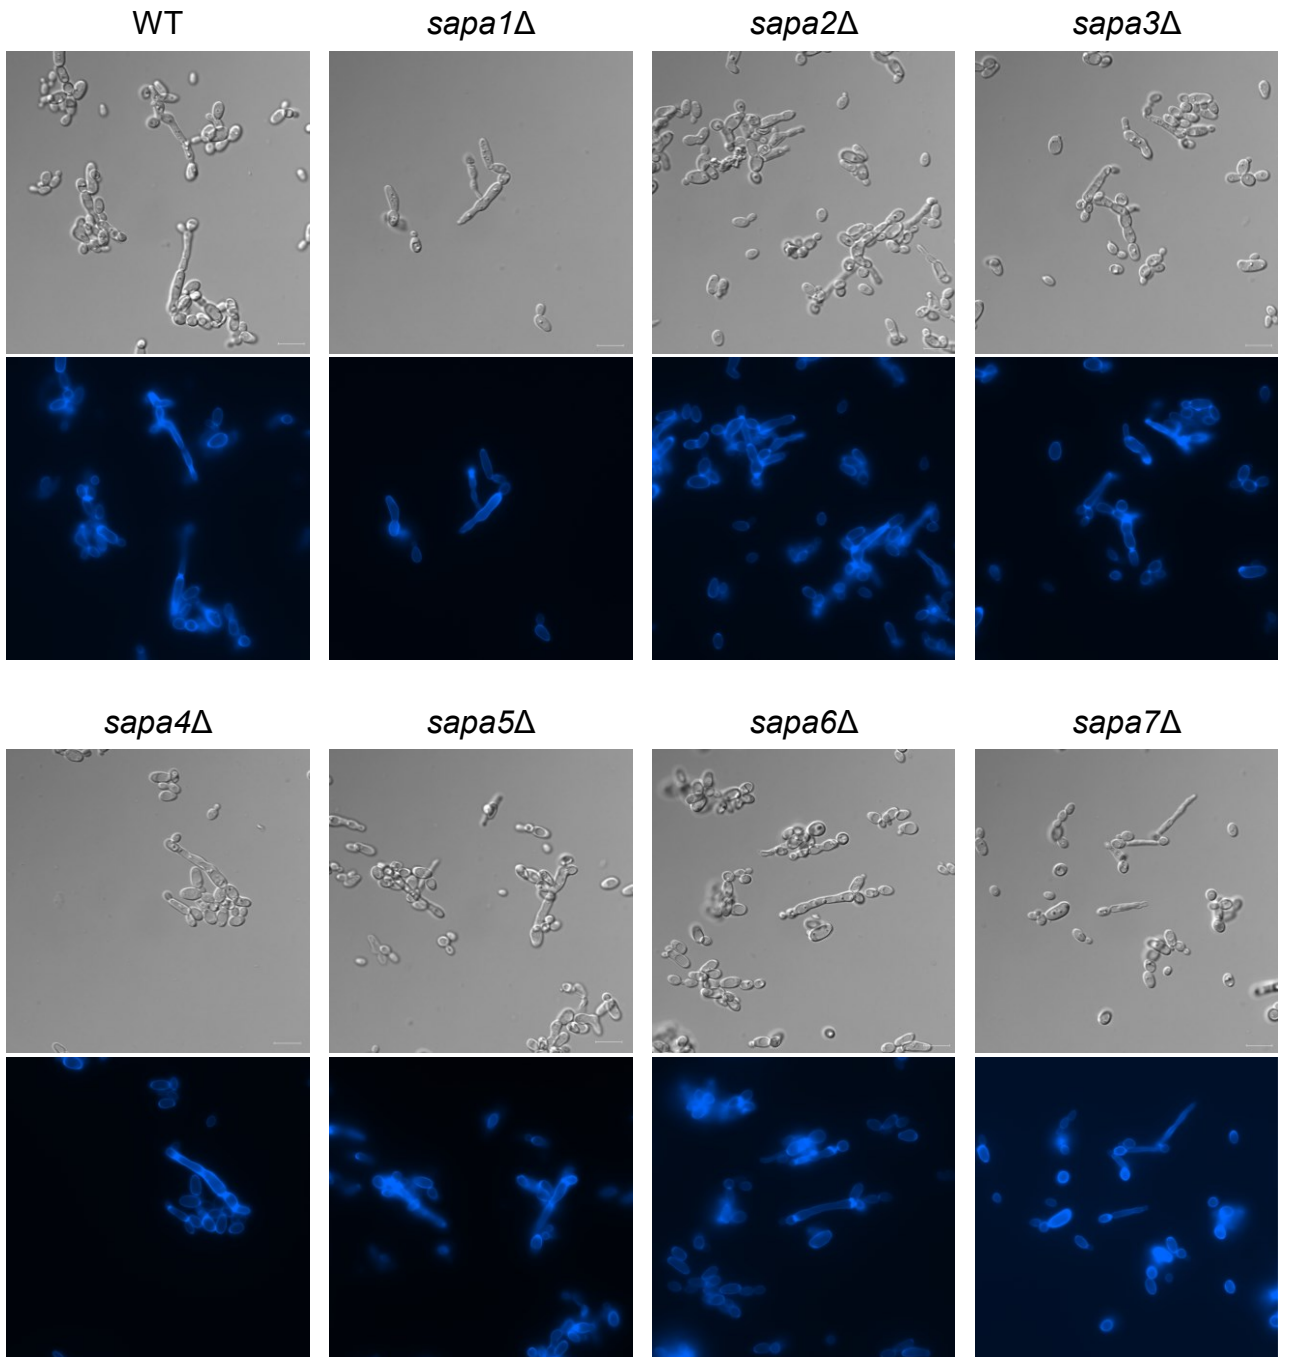

Figure S3 (Kim et al.)

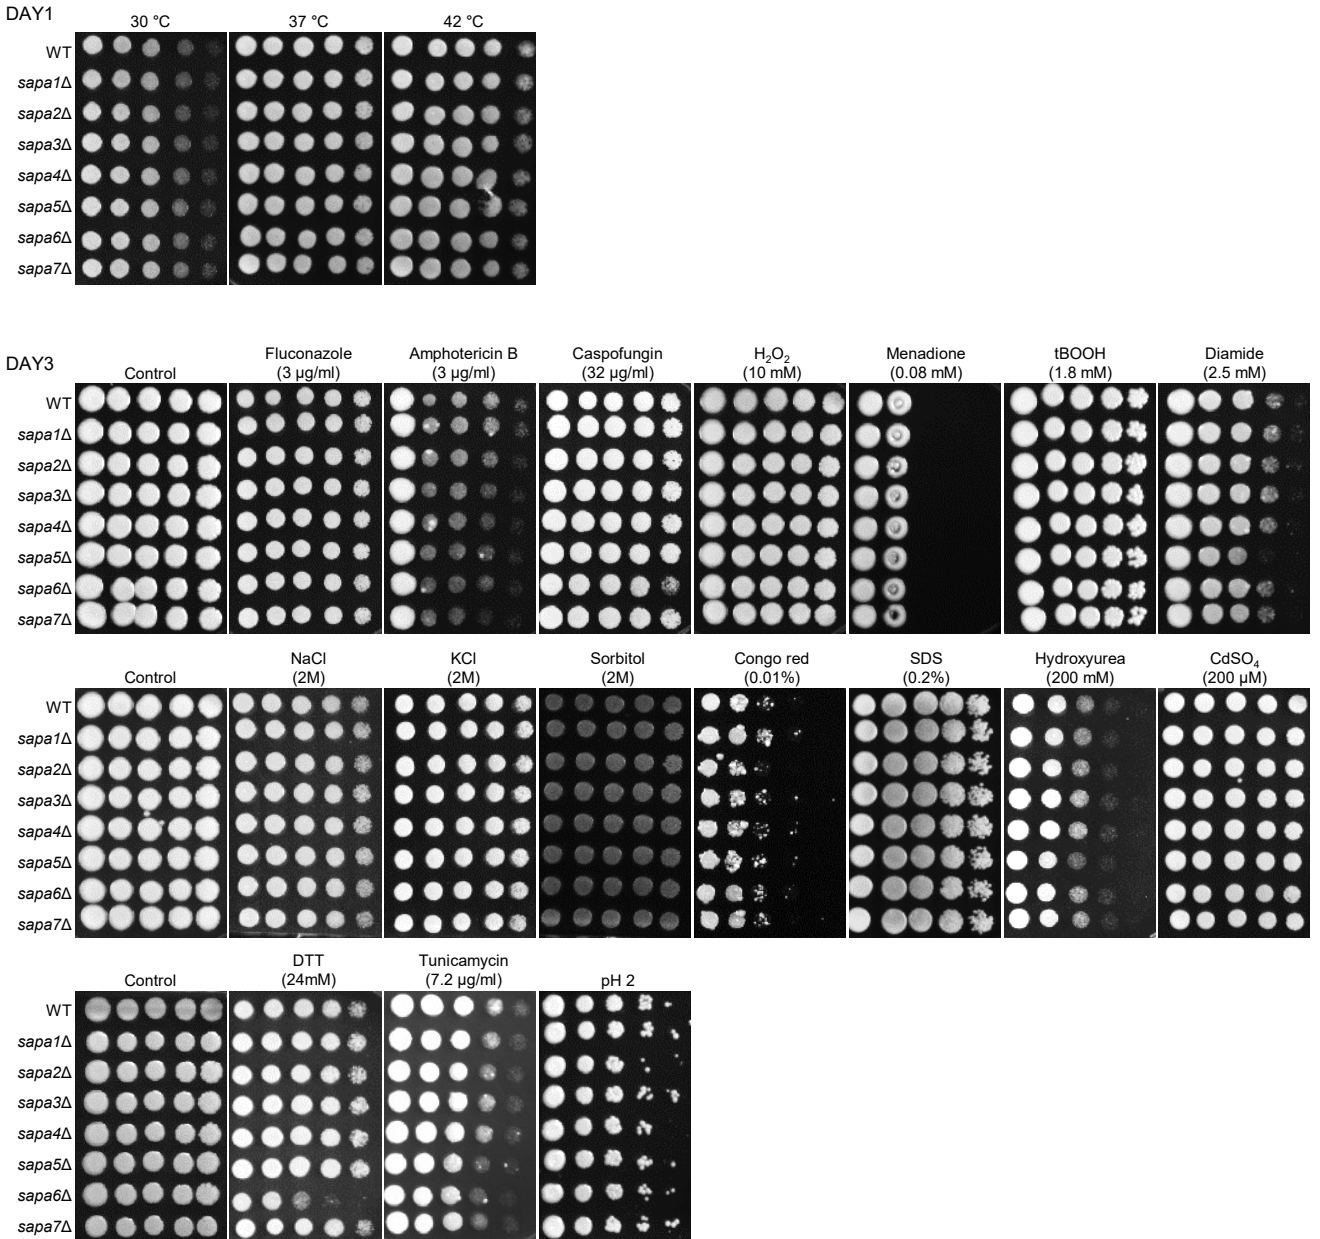

Supplement: Image_1.pdf [file Image_1.pdf]
