# Supplementary material for: Secreted aspartyl protease 3 regulated by the Ras/cAMP/PKA pathway promotes the virulence of Candida auris
Source: PubMed Central journal article supplement (PMC10540861; doi:10.3389/fcimb.2023.1257897), 2023-09-15
Supplement: Table_1.pdf [file Table_1.pdf]

**Table S1. *C. auris* strains and primers used in this study**

| <b>Strains used in this study</b> |                              |               |                      |
|-----------------------------------|------------------------------|---------------|----------------------|
| <b>Strain</b>                     | <b>Genotype</b>              | <b>Parent</b> | <b>Reference</b>     |
| <b>B8441</b>                      | Wild-type                    |               | (Munoz et al., 2018) |
| <b>YSBA21</b>                     | <i>cyr1Δ::NAT</i>            | B8441         | (Kim et al., 2021)   |
| <b>YSBA24</b>                     | <i>tpk2Δ::NAT tpk1Δ::HYG</i> | YSBA17        | (Kim et al., 2021)   |
| <b>YSBA39</b>                     | <i>gpa2Δ::NAT</i>            | B8441         | (Kim et al., 2023)   |
| <b>YSBA41</b>                     | <i>ras1Δ::NAT</i>            | B8441         | (Kim et al., 2023)   |
| <b>YSBA46</b>                     | <i>gpr1Δ::NAT</i>            | B8441         | (Kim et al., 2023)   |
| <b>YSBA61</b>                     | <i>cdc25Δ::NAT</i>           | B8441         | (Kim et al., 2023)   |
| <b>YSBA68</b>                     | <i>gpa2Δ::NAT ras1Δ::HYG</i> | YSBA39        | (Kim et al., 2023)   |
| <b>YSBA77</b>                     | <i>sapa1Δ::NAT</i>           | B8441         | This study           |
| <b>YSBA81</b>                     | <i>sapa2Δ::NAT</i>           | B8441         | This study           |
| <b>YSBA91</b>                     | <i>sapa6Δ::NAT</i>           | B8441         | This study           |
| <b>YSBA119</b>                    | <i>sapa3Δ::NAT</i>           | B8441         | This study           |
| <b>YSBA123</b>                    | <i>sapa3Δ::SAPA3-HYG</i>     | YSBA119       | This study           |
| <b>YSBA125</b>                    | <i>sapa5Δ::NAT</i>           | B8441         | This study           |
| <b>YSBA127</b>                    | <i>sapa7Δ::NAT</i>           | B8441         | This study           |
| <b>YSBA135</b>                    | <i>sapa4Δ::NAT</i>           | B8441         | This study           |

## Primers used in this study

| Name   | Primer description                         | Sequence (5' to 3')                       |
|--------|--------------------------------------------|-------------------------------------------|
| B15692 | <i>SAPAI</i> 5'-flanking region primer L1  | GGCTGTAGATGAGCCGTAGG                      |
| B15693 | <i>SAPAI</i> 5'-flanking region primer L2  | TTCAGATCCACTAGTTCTAGCGAGTGTGTTGGTTGATGA   |
| B15694 | <i>SAPAI</i> 3'-flanking region primer R1  | TTCCAGAATTTCACTCTTAATTTTTTTTAGATTTTTTA    |
| B15695 | <i>SAPAI</i> 3'-flanking region primer R2  | GGGTATGTGCTTGCTTGGTT                      |
| B15696 | <i>SAPAI</i> 5'-screening primer SO        | AGGTCACCCACAGGAGTCAC                      |
| B15697 | <i>SAPAI</i> 3'-screening primer SO2       | TGTGTTGGTGCCTTTGACAT                      |
| B15698 | <i>SAPAI</i> Southern blot probe primer PO | AAGAGGCGCCTTCCTCAGGC                      |
| B15721 | <i>SAPAI</i> Internal screening primer LP  | TGTATGGTCCCCTCCGAGAAG                     |
| B15722 | <i>SAPAI</i> Internal screening primer RP  | AAGAGACACTGGCCCTGAGA                      |
| B16032 | <i>SAPA2</i> 5'-flanking region primer L1  | AACTTGCCAGCCAAGCTTTA                      |
| B16033 | <i>SAPA2</i> 5'-flanking region primer L2  | TTCAGATCCACTAGTTCTAGGAAGATTGATTCAAAAGACT  |
| B16034 | <i>SAPA2</i> 3'-flanking region primer R1  | TTCCAGAATTTCACTCTTAAAAAGTTTCTATGCCAATA    |
| B16035 | <i>SAPA2</i> 3'-flanking region primer R2  | GGAAGGTCCGGTGATTGAAAA                     |
| B16036 | <i>SAPA2</i> 5'-screening primer SO        | CCTCAACATTTTGCATGACG                      |
| B16037 | <i>SAPA2</i> 3'-screening primer SO2       | GGACGGAACCTCGTTGTTGAT                     |
| B16038 | <i>SAPA2</i> Southern blot probe primer PO | TTTGTCGAGAGCCAGAGAGT                      |
| B16039 | <i>SAPA2</i> Internal screening primer LP  | TCTCTTTTGCCTTGCTTGT                       |
| B16040 | <i>SAPA2</i> Internal screening primer RP  | AATAGGACGCCTTTGGTGTG                      |
| B16580 | <i>SAPA3</i> 5'-flanking region primer L1  | AAACCTGCCCTCCAGTAAT                       |
| B16581 | <i>SAPA3</i> 5'-flanking region primer L2  | TTCAGATCCACTAGTTCTAGGGCGAGGGTGAAGATGGTCA  |
| B16582 | <i>SAPA3</i> 3'-flanking region primer R1  | TTCCAGAATTTCACTCTTAATGCTTCAGGTAAGCACCAC   |
| B16583 | <i>SAPA3</i> 3'-flanking region primer R2  | TGATCAACCAGGACGTGTGT                      |
| B16584 | <i>SAPA3</i> 5'-screening primer SO        | AACCGAGAGATGCAAGGAGA                      |
| B16585 | <i>SAPA3</i> 3'-screening primer SO2       | TTCTTGAGAGACCCTGTGG                       |
| B16588 | <i>SAPA3</i> Southern blot probe primer PO | GTGACCTTGTCTGTCTGAGAGA                    |
| B16586 | <i>SAPA3</i> Internal screening primer LP  | TCTCAGCACGACAAGGTCAC                      |
| B16587 | <i>SAPA3</i> Internal screening primer RP  | GGCACCCAAAGAACACACTT                      |
| B16636 | <i>SAPA5</i> 5'-flanking region primer L1  | CTTATATGCCTTGCGGTGGT                      |
| B16637 | <i>SAPA5</i> 5'-flanking region primer L2  | TTCAGATCCACTAGTTCTAGTGTGTTGATAGCGATGAAAAT |
| B16638 | <i>SAPA5</i> 3'-flanking region primer R1  | TTCCAGAATTTCACTCTTAGCGCACGTTTCGATCGATTGC  |
| B16639 | <i>SAPA5</i> 3'-flanking region primer R2  | GATCCGGTTGCACACTAC                        |
| B16640 | <i>SAPA5</i> 5'-screening primer SO        | GTGAGGAAAGGGAATGGACA                      |
| B16641 | <i>SAPA5</i> 3'-screening primer SO2       | TGCCACAGGCTGTATGTAA                       |
| B16644 | <i>SAPA5</i> Southern blot probe primer PO | ACTTGAGTTGCCACATTC                        |
| B16642 | <i>SAPA5</i> Internal screening primer LP  | GCTTTGACGGAGAGACCTTG                      |
| B16643 | <i>SAPA5</i> Internal screening primer RP  | CAAAATGTAGCGTCTGGT                        |
| B16625 | <i>SAPA5</i> 5'-flanking region primer L1  | GAGAAGCGCATTTACCGAAG                      |
| B16626 | <i>SAPA4</i> 5'-flanking region primer L2  | TTCAGATCCACTAGTTCTAGTGAGGATGATTTTTGGAAAG  |
| B16627 | <i>SAPA4</i> 3'-flanking region primer R1  | TTCCAGAATTTCACTCTTACAGTGATGTTGGAGTCTAA    |

|               |                                                   |                                           |
|---------------|---------------------------------------------------|-------------------------------------------|
| <b>B16628</b> | <i>SAPA4</i> 3'-flanking region primer R2         | TTACTAAGATGCCCGCCTTG                      |
| <b>B16629</b> | <i>SAPA4</i> 5'-screening primer SO               | ATCAATTTCCGCAATGCTTC                      |
| <b>B16630</b> | <i>SAPA4</i> 3'-screening primer SO2              | CGCTTGAACATTTGACTCA                       |
| <b>B16633</b> | <i>SAPA4</i> Southern blot probe primer PO        | GGTCAGAAGAGCCAGTGTC                       |
| <b>B16631</b> | <i>SAPA4</i> Internal screening primer LP         | AGAACC GTTGCTCTCTCAA                      |
| <b>B16632</b> | <i>SAPA4</i> Internal screening primer RP         | TCGTAGTGTGGATGCAGCTC                      |
| <b>B18843</b> | <i>SAPA6</i> 5'-flanking region primer L1         | CAGAAGCCAATGATCAGCAA                      |
| <b>B18844</b> | <i>SAPA6</i> 5'-flanking region primer L2         | TTCAGATCCACTAGTTCTAGTGTATTTAGATCTTATCCC   |
| <b>B18845</b> | <i>SAPA6</i> 3'-flanking region primer R1         | TTTCCAGAATTTCACTCTTAAGGATTGATAGATTTTCCACA |
| <b>B18846</b> | <i>SAPA6</i> 3'-flanking region primer R2         | GATTGGCTCACCGAGAAGAA                      |
| <b>B16368</b> | <i>SAPA6</i> 5'-screening primer SO               | TCTGAAATCCCAAGATTTCG                      |
| <b>B13689</b> | <i>SAPA6</i> 3'-screening primer SO2              | TTTGGTCTCGACAGACAAG                       |
| <b>B18847</b> | <i>SAPA6</i> Southern blot probe primer PO        | CCATCTCGCTTGACAAAGGT                      |
| <b>B16370</b> | <i>SAPA6</i> Internal screening primer LP         | AACGAATCCATCTCGTCCAC                      |
| <b>B16371</b> | <i>SAPA6</i> Internal screening primer RP         | GCACACTCACCAACACCATC                      |
| <b>B16943</b> | <i>SAPA7</i> 5'-flanking region primer L1         | TTGTGGCCATGATGAGAAAA                      |
| <b>B16944</b> | <i>SAPA7</i> 5'-flanking region primer L2         | TTCAGATCCACTAGTTCTAGGTTGGAAAAGAGAAGACGGA  |
| <b>B16945</b> | <i>SAPA7</i> 3'-flanking region primer R1         | TTTCCAGAATTTCACTCTTATACAATAAATATATATGTAT  |
| <b>B16946</b> | <i>SAPA7</i> 3'-flanking region primer R2         | CGTCCAAGGCCTATGACAAT                      |
| <b>B16947</b> | <i>SAPA7</i> 5'-screening primer SO               | GCCCTTACAACGTACCCTCA                      |
| <b>B16948</b> | <i>SAPA7</i> 3'-screening primer SO2              | GCCGATACCCTTGCTACCA                       |
| <b>B16951</b> | <i>SAPA7</i> Southern blot probe primer PO        | TGTCGCCGTACAAGACGTAG                      |
| <b>B16949</b> | <i>SAPA7</i> Internal screening primer LP         | GAGAGACGACGACACGTTGA                      |
| <b>B16950</b> | <i>SAPA7</i> Internal screening primer RP         | CAAGAGCACGTTGGTTCTGA                      |
| <b>B11103</b> | pV1025 forward-extended primer                    | CTAGAACTAGTGGATCTGAA                      |
| <b>B11104</b> | pV1025 reverse-extended primer                    | TAAGAGTGAAATTCTGGAAA                      |
| <b>B11105</b> | <i>NAT</i> split primer 1                         | CCATTGACTAAGGTTTCCC                       |
| <b>B11106</b> | <i>NAT</i> split primer 2                         | TTCAGTAGCCAAACCCATC                       |
| <b>B11107</b> | pV1025 Diagnostic screening primer 1              | TCAGTGGCAAATCCTAACC                       |
| <b>B11108</b> | pV1025 Diagnostic screening primer 2              | AGAGAAAATACCCGTGACG                       |
| <b>B17342</b> | CLP for <i>SAPA3</i> complementation              | TTGTTTACTGAGGACAAGGA                      |
| <b>B17343</b> | CRP for <i>SAPA3</i> complementation              | TATTTCCCTGAGAGACCCTG                      |
| <b>B17347</b> | Screening primer for <i>SAPA3</i> complementation | GCCTACATTTGCCAGGAAAG                      |
| <b>B17344</b> | <i>SAPA3</i> sequencing primer 1                  | TGTATCTATAATAAGATTCC                      |
| <b>B17345</b> | <i>SAPA3</i> sequencing primer 2                  | TTTTTCCATCCAGTACTTGG                      |
| <b>B11749</b> | <i>ACT1</i> qRT-PCR primer 1                      | TTGCTCCTGAAGAACACCTT                      |
| <b>B11750</b> | <i>ACT1</i> qRT-PCR primer 2                      | GCAGGAACGTTGAAGGTCTC                      |
| <b>B17310</b> | <i>SAPA3</i> qRT-PCR primer 1                     | AGGCGAGCCTACTTACGACA                      |
| <b>B17311</b> | <i>SAPA3</i> qRT-PCR primer 2                     | CTCAGAGCCCAAGAACAAGG                      |

## References

- Kim, J.S., Lee, K.T., and Bahn, Y.S. (2023). Deciphering the regulatory mechanisms of the cAMP/PKA pathway and their roles in the pathogenicity of *Candida auris*. *Microbiol Spectr*. doi: 10.1128/spectrum.02152-23.
- Kim, J.S., Lee, K.T., Lee, M.H., Cheong, E., and Bahn, Y.S. (2021). Adenylyl cyclase and protein kinase A play redundant and distinct roles in growth, differentiation, antifungal drug resistance, and pathogenicity of *Candida auris*. *mBio* 12, e0272921. doi: 10.1128/mBio.02729-21
- Munoz, J.F., Gade, L., Chow, N.A., Loparev, V.N., Juieng, P., Berkow, E.L., Farrer, R.A., Litvintseva, A.P., and Cuomo, C.A. (2018). Genomic insights into multidrug-resistance, mating and virulence in *Candida auris* and related emerging species. *Nat Commun* 9, 5346. doi: 10.1038/s41467-018-07779-6
